# Supplementary material for: Phosphorylation promotes Al(iii) binding to proteins: GEGEGSGG as a case study
Source: Royal Society of Chemistry journal article supplement (doi:10.1039/c5cp06379e), 2016-01-01
Supplement: c5cp06379e1.pdf [file c5cp06379e1.pdf]

## Supporting Information

**Table S1.** Structures by group using the clustering tool of Gromacs and % of structures collected in the first five groups.

| Non-phosphorylated peptide |      |      |      |      |      |      |      |
|----------------------------|------|------|------|------|------|------|------|
| Group                      | Free | N1   | N2   | N3   | N4   | N5   | N6   |
| 1                          | 300  | 558  | 396  | 412  | 465  | 1853 | 1227 |
| 2                          | 208  | 283  | 235  | 312  | 274  | 130  | 546  |
| 3                          | 161  | 234  | 197  | 294  | 190  | 16   | 83   |
| 4                          | 135  | 94   | 135  | 116  | 154  | 1    | 60   |
| 5                          | 111  | 87   | 128  | 111  | 145  | 1    | 43   |
| % Structures               | 45.7 | 62.7 | 54.5 | 62.2 | 61.3 | 99.9 | 97.8 |
| Phosphorylated peptide     |      |      |      |      |      |      |      |
|                            | Free | P1   | P2   | P3   | P4   | P5   |      |
| 1                          | 344  | 878  | 332  | 341  | 865  | 591  |      |
| 2                          | 324  | 394  | 294  | 196  | 719  | 233  |      |
| 3                          | 292  | 188  | 189  | 174  | 177  | 185  |      |
| 4                          | 118  | 109  | 142  | 147  | 66   | 159  |      |
| 5                          | 114  | 72   | 99   | 142  | 61   | 112  |      |
| % Structures               | 59.5 | 82.0 | 52.7 | 50.0 | 94.3 | 64.0 |      |

### Note S1

The geometry optimizations of the aluminum complexes with the phosphorylated derivative displayed some proton transfer from water molecules to the closer carboxyl group; in the P1 went to E2, in P2 went to E4, in P3 double proton transfer to PO<sub>4</sub>, and in P4 and P5 none proton transfer.
